1

2

3 Detecting space-time clusters of dengue fever in Panama after adjusting for vector  
4 surveillance data

5

6 Ari Whiteman<sup>1,2\*</sup>¶, Michael R. Desjardins<sup>2</sup>¶, Gilberto A. Eskildsen<sup>4</sup>¶, Jose R. Loaiza<sup>1,3,5</sup>¶

7

8 **Author Affiliations:**

9 <sup>1</sup>Smithsonian Tropical Research Institute, Balboa Ancón, Republic of Panama (A. Whiteman, J.R.  
10 Loaiza)

11 <sup>2</sup>Department of Geography and Earth Sciences, Center for Applied Geographic Information Science,  
12 University of North Carolina at Charlotte, Charlotte, NC, USA (M. Desjardins)

13 <sup>3</sup>Instituto de Investigaciones Científicas y Servicios de Alta Tecnología, Panama City, Republic of  
14 Panama (J.R. Loaiza)

15 <sup>4</sup>Department of Biotechnology, Acharya Nagarjuna University, Guntur, India (G.A. Eskildsen)

16 <sup>5</sup>Programa Centroamericano de Maestría en Entomología, Universidad de Panamá, Panama City,  
17 Republic of Panama (J.R. Loaiza)

18

19 \*Corresponding author

20 Email: [osa0@cdc.gov](mailto:osa0@cdc.gov)

21

22 ¶These authors contributed equally

23

24

## 25 Abstract – 206 words

26 Long term surveillance of vectors and arboviruses is an integral aspect of disease prevention and  
27 control systems in countries affected by increasing risk. Yet, little effort has been made to adjust space-  
28 time risk estimation by integrating disease case counts with vector surveillance data, which may result in  
29 inaccurate risk projection when several vector species are present, and little is known about their likely  
30 role in local transmission. Here, we integrate 13 years of dengue case surveillance and associated *Aedes*  
31 occurrence data across 462 localities in 63 districts to estimate the risk of infection in the Republic of  
32 Panama. Our space-time modelling approach detected the presence of five clusters, which varied by  
33 duration, relative risk, and spatial extent after incorporating vector species as covariates. Dengue  
34 prevalence (n = 49,910) was predicted by the presence of resident *Aedes aegypti* alone, while all other  
35 covariates exhibited insignificant statistical relationships with it, including the presence and absence of  
36 invasive *Aedes albopictus*. Furthermore, the *Ae. aegypti* model contained the highest number of districts  
37 with more dengue cases than would be expected given baseline population levels. This implies that  
38 arbovirus case surveillance coupled with entomological surveillance can affect cluster detection and risk  
39 estimation, improving efforts to understand outbreak dynamics at national scales.

40

## 41 Author Summary

42 Dengue cases have increased in tropical regions worldwide owing to climate change,  
43 urbanization, and globalization facilitating the spread of *Aedes* mosquito vectors. National surveillance  
44 programs monitor trends in dengue fever and inform the public about epidemiological scenarios where  
45 outbreak preventive actions are most needed. Yet, most estimations of dengue risk so far derive only  
46 from disease case data, ignoring *Aedes* occurrence as a key aspect of dengue transmission dynamic.  
47 Here we illustrate how incorporating vector presence and absence as a model covariate can considerably  
48 alter the characteristics of space-time cluster estimations of dengue cases. We further show that *Ae.*

49 *aegypti* has likely been a greater driver of dengue infection in high risk districts of Panama than *Ae.*  
50 *albopictus*, and provide a discussion of possible public health implications of both spatial and non-  
51 spatial model outcomes.

52 **Text Word Count: 3658**

## 53 **Introduction**

54 Dengue fever, a disease transmitted to humans by *Aedes* mosquitoes, is endemic to 128  
55 countries, with 3.9 billion people considered at-risk [1]. Dengue fever cases have increased dramatically  
56 worldwide throughout the previous several decades [2], likely a result of climate change [3],  
57 urbanization [4], globalization [5], and the spread of the invasive *Aedes albopictus* [6]. As a result of  
58 both recent and historical risk, many countries employ national surveillance programs to monitor trends  
59 in dengue fever and inform local health authorities to the places and times where preventative practices  
60 are most required. However, despite the commonality of these programs and unforeseen cost of cutting  
61 them [7], surveillance budgets are often limited [8,9], restricting the scope and quality of the work. This  
62 is concerning in developing regions such as Central America, where the burden of disease is high [1]  
63 and per capita public health expenditure is among the lowest of any region of the world [10].

64 Surveillance of both viruses and vectors is an essential component of integrated disease  
65 management programs that can be used to determine risk changes in space and time, thus providing the  
66 evidence for more targeted prevention and control interventions [11]. Nevertheless, with few exceptions,  
67 it is rare for surveillance programs to concurrently monitor both arbovirus cases and vector populations  
68 in the same locations and at regular intervals. Most projections of disease risk used to justify public  
69 health actions are derived purely from disease case data, ignoring vector population dynamics, which is  
70 key aspect of the vector transmission model. This is particularly concerning when more than one vector  
71 species is present, and little is known about their likely role in local transmission, which may result in  
72 inaccurate or incomplete risk projection or case clustering models.

73 The Republic of Panama has been monitoring dengue cases alongside vector presence through  
74 the National Department of Epidemiology (NDE) since 1988, making it one of the most long-standing  
75 and successful surveillance programs of its kind in Latin America. Of the two known dengue mosquito  
76 vectors, *Ae. aegypti* is considered resident to Latin America and Panama since the 19<sup>th</sup> century, and the  
77 primary source of transmission [11] while *Ae. albopictus*, considered a secondary vector, has been  
78 spreading throughout the region ever since it got introduced in Panama in 2004 [12,13]. Widespread  
79 extirpation of *Ae. aegypti* by a superior ecological competitor like *Ae. albopictus* has occurred  
80 throughout the world in recent decades [14–16], with unknown consequences on arbovirus transmission  
81 risk. Encompassing this period of growing interspecific competition among two vector species,  
82 Panama’s surveillance system is particularly unique and potentially useful to modelling dengue  
83 transmission risk while considering *Aedes* species interaction. Attaining a better understanding of  
84 dengue outbreak dynamics over time may improve the capacity of public health authorities to combat  
85 the spread of other arboviruses, such as Zika Virus and Chikungunya Virus.

86 Our overall aim is to examine the influence that concurrent dengue case surveillance and *Aedes*  
87 species monitoring can have on cluster detection and relative risk estimation. In so doing, we describe  
88 the results of 13 years of dengue fever and *Aedes* surveillance data, including two competing vector  
89 species plus virus data originating from long-term cooperatively organized surveillance programs. We  
90 further assess whether dengue prevalence can be attributed to district socioeconomic attributes. We  
91 believe this is the first effort to adjust for vector presence and absence in a disease cluster detection  
92 model, which we hope sheds light on the characteristics of space-time clusters and relative risk  
93 estimation of dengue after *Aedes* species are used as model covariates.

94

## 95 **Methods**

### 96 **Dengue Data**

97 We utilized dengue prevalence data collected by the National Department of Epidemiology  
98 (NDE), housed within the Panamanian Ministry of Health (MINSa). Systematic national surveillance of  
99 dengue cases in Panama have been continuous since 1988. Suspected cases are defined by a patient with  
100 a fever and one or more of the following symptoms: headache, retro orbital pain, myalgia, exanthema,  
101 rash, vomiting, malaise, leukopenia, and jaundice. A confirmed case is defined as a suspected case with  
102 a positive dengue test, conducted using either viral isolation, reverse transcription polymerase chain  
103 reaction (RT-PCR), IgM enzyme-linked immunosorbent assay platform (ELISA), or secondary IgG  
104 ELISA. RT-PCR was established as the original standard by the National Reference Laboratory at the  
105 Gorgas Memorial Institutes for Health Studies (ICGES) in 2003. Yet since 2009, MINSa established  
106 national decentralization of serological confirmation of dengue using ELISA tests, which has improved  
107 efficiency by allowing district health officials to confirm cases without needing to send samples to a  
108 single central facility in Panama City. Data is recorded at the *Corregimiento*, or neighborhood, scale as  
109 the number of confirmed cases in a given year at a given location. This is the lowest scale of data  
110 granularity available, and thus, we do not have patient-level detail nor temporal detail at smaller units  
111 than year.

112

### 113 **Vector Data**

114 We utilized vector data from the Vector Control Department (VCD) at MINSa. Systematic  
115 entomological surveillance has occurred in Panama since 2000 in order to establish *Aedes* infestation  
116 rates, and thus, areas of potential dengue transmission risk. Surveys of both *Ae. aegypti* and *Ae.*  
117 *albopictus* are performed annually at the *Corregimiento*-scale and consist of solely larval surveillance.  
118 Each year, a random block of houses is chosen and all houses in the block are searched for containers  
119 holding *Aedes* larvae. The larvae are collected and allowed to mature to the fourth instar, at which point  
120 they are taxonomically identified to species based on morphological keys [17]. The number of houses

121 positive for *Ae. aegypti*, *Ae. albopictus* or both are recorded in the raw datasets. However, because we  
122 cannot confirm the number of houses in each block, we have transformed the data into a presence-  
123 absence format in each *Corregimiento* rather than analyzing the number of positive houses.

124

## 125 **Data Analysis**

126 We conducted our analyses on dengue and vector data from 2005-2017, encompassing the period  
127 in Panama when both *Ae. aegypti* and *Ae. albopictus* have been interacting. Overall, data was collapsed  
128 from the original *Corregimiento* scale to the district scale. This is due to unreliable human population  
129 estimates at scales smaller than the district. Population levels were required to compute prevalence rate  
130 (x1000; PR), which was used as the dependent variable in the statistical analysis, rather than pure  
131 number of cases, which does not consider the total number of potential virus hosts. Human population  
132 data was gathered from the National Institute of Statistics and Census (INEC), which conducts a national  
133 census every 10 years. We also gathered three socioeconomic metrics from INEC to use as covariates:  
134 percentage of households with dirt floors, percentage of households without clean water, and percentage  
135 of households without sanitary services. These covariates were chosen due to their relationship to  
136 standing water, which may act as potential *Aedes* breeding habitat. Because the national census is only  
137 conducted every ten years, we used the population levels from 2010 to calculate PR for data from 2005-  
138 2017. While this is not ideal, and incurs inherent error in the year to year accuracy of the PR estimate,  
139 there is no more frequent population estimate available. This is an unfortunately common situation,  
140 especially in Central America, where no country conducts national population assessments more  
141 frequently than every 10 years. The three socioeconomic variables are at their 2010 levels as well,  
142 sourced from the same census as population.

143 We conducted two sets of analyses, non-spatial and spatial. The purpose of the spatial analyses  
144 was exploratory, assessing the relationship between vector and virus in space and time. This was

145 conducted first, to establish a baseline understanding of how the addition of vector surveillance data  
146 affects the estimation of the size and relative risk of case clusters. We followed the spatial modeling  
147 with non-spatial statistical modelling, which served to test the hypotheses established by the spatial  
148 models. Thus, the non-spatial models essentially serve to identify the significant covariates that can be  
149 adjusted for in the spatial model

150 For the spatial analyses, we utilize discrete Poisson space-time modelling STSS [18], which  
151 systematically moves cylindrical search windows across the geographic and temporal space to detect  
152 space-time clusters. Essentially, STSS determines if the observed disease cases in a particular region  
153 and time period exceed the expected cases under baseline conditions. In vector-borne disease research,  
154 STSS have been used to examine outbreaks of dengue [19–21], chikungunya [22], malaria [23,24],  
155 Chagas [25], and West Nile [26,27], for example. STSS have also been used to examine the co-  
156 circulation of dengue and chikungunya in Colombia [28].

157 The cylinders are centered on the centroids of the Panamanian districts while the base of a  
158 cylinder is defined as the spatial scan, and the height of a cylinder represents the temporal scan. The  
159 number of observed and expected dengue cases are computed for each cylinder. Conceptually, a vast  
160 number of cylinders of various space-time dimensions are generated until an upper bound is reached,  
161 while each cylinder is a potential cluster. For this study, the maximum spatial scan was set to 25% of  
162 the total population in Panama, while the maximum temporal scan was set to 4 years. A Poisson-based  
163 likelihood ratio is calculated for each cylinder, which is proportional to  $(n/\mu)^n [(N-n)/(N-\mu)]^{N-n}$   
164 [29]. For the parameters,  $\mu$  is the expected number of dengue cases in a cylinder, and  $n$  is the total  
165 observed dengue cases in the cylinder. The expected number of dengue cases is computed by  
166 multiplying the fraction of population that lives within the cylinder ( $p$ ) by the total number of cases in  
167 Panama ( $C$ ) divided by the total population ( $P$ ), that is:  $E[c] = p * C / P$  - The cylinder with the highest  
168 likelihood ratio is the most likely space-time cluster. To evaluate the statistical significance of the

169 candidate space-time clusters, 999 Monte Carlo simulations are performed under the null hypothesis that  
170 there are no significant clusters. Subsequently, we report secondary space-time clusters with a p-value  
171 less than 0.05.

172 For this study, we ran four STSS models: (1) dengue cases only; (2) dengue cases controlled for  
173 the presence and absence of *Ae. aegypti* and/or *Ae. albopictus* (i.e. absence of both species, *Ae. aegypti*  
174 presence, *A. albopictus* presence, and presence of both species); (3) dengue cases controlled for *Ae.*  
175 *aegypti* presence/absence only; and (4) dengue cases controlled for *Ae. albopictus* presence/absence  
176 only. For the covariate adjusted models, the expected number of dengue cases is defined the same way  
177 for the non-adjusted model, but includes covariate category *i*. That is:  $E[c] = \sum_i p_i * \frac{C_i}{P_i}$ . In other words,  
178 the adjusted STSS searches for clusters “above and beyond that which is expected due to these  
179 covariates” (47). For each model, we also report the relative risk of prevalence in each district that  
180 belongs to a space-time cluster, which is defined as  $(c/e)/[(C - c)/(C - e)]$ , where *c* is the total  
181 observed dengue cases in a particular district; *e* is the expected cases in a district; and *C* is the total  
182 observed dengue cases in the country of Panama. Clusters with a relative risk > 1 indicates that there  
183 were more observed dengue cases than expected under baseline conditions. We created all maps in  
184 ArcGIS [30].

185 In the non-spatial analyses we used generalized linear models (GLM; McCullagh & Nelder,  
186 1972) with a log linkage to determine if dengue PR could be predicted by the presence of *Ae. albopictus*  
187 alone, *Ae. aegypti* alone, the presence of both species, and the three socioeconomic attributes of the  
188 district. In addition, we tested whether the presence of *Ae. aegypti* was negatively associated with the  
189 occurrence of *Ae. albopictus*, which has been proposed by previous studies describing a pattern of  
190 spatial displacement. GLMs are robust and capable of being applied to data without homogeneous  
191 variance or normality. They have been utilized in a variety of studies on the public health implications of  
192 *Aedes* mosquito ecology [32–34].



193

## 194 **Results**

195 From 2005-2017, there were a total of 49,910 cases of dengue fever in Panama, with 2009 and  
196 2014 being the most severe at 6,941 and 7,423 cases respectively. These two years represented 28% of  
197 the total dengue cases during the 13-year period. Additionally, at the start of the sample period, *Ae.*  
198 *albopictus* was only present in 1 district, yet by 2017 had been found in 53 districts. It exhibited a  
199 slightly increasing trajectory throughout time and has been present in the same number of districts as *Ae.*  
200 *aegypti* since 2016. Surveillance of *Ae. aegypti* indicated fluctuating presence throughout the sample  
201 period, with presence ranging from 48-57 districts (Fig 1).

202

### 203 **Fig 1. Number of districts containing each *Aedes* species from 2005-2017.**

204

205 The results of our space-time modelling detected the presence of five clusters in each of the four  
206 models, varying by cluster center and duration (Figs 2-5; Table 1). Incorporating covariates into the  
207 models had considerable effects on the duration, relative risk (RR), and spatial extent of clusters (Table  
208 2). The model adjusting for the presence of *Ae. aegypti* encompassed the greatest spatial range and  
209 highest number of districts with a RR > 1, while the model adjusting for the presence of *Ae. albopictus*  
210 encompassed the smallest spatial range and the lowest number of districts with a RR > 1. The duration  
211 of the space-time clusters is notably different when adding the vector surveillance data to the model,  
212 however, the one exception is cluster 1 for each model (most likely cluster). For example, the duration  
213 of cluster 2 was 2015-2017 for the no covariate and *Ae. aegypti* model; while the *Ae. albopictus* and  
214 *Aedes* (both) model reported a duration of only 1 year, which occurred six years earlier (2009).  
215 Furthermore, cluster 2 was found in different geographic locations for the *Aedes* (both) and *Ae.*  
216 *albopictus* models. This variation in duration of the clusters between the four models is a result of

217 adjusting for the presence of *Aedes* during the 13-year study period. In other words, the start, end, and  
 218 duration of the clusters is substantially affected by the presence of one or more *Aedes* species. The  
 219 relative risk may be higher if *Aedes* was found in a district during the entire duration of a space-time  
 220 cluster. During the 13 years of our study period combined with the 63 districts containing data (13 \* 63  
 221 = 819), *Ae. aegypti* was present 690 times, *Ae. albopictus* was present 245 times, while both *Aedes*  
 222 species were found in a district 224 times. As a result, the difference in species presence during the  
 223 study period partly explains why the clusters for the *Ae. albopictus* model contained 19 less districts  
 224 than the *Ae. aegypti* model, and 10 less districts than the model adjusting for both species.

225

226 **Table 1. Space-time dengue fever clusters.**

| Cluster                                                           | Center of Cluster | Duration (years) | p-value | Observed | Expected | Relative Risk | Districts | Cluster Population |
|-------------------------------------------------------------------|-------------------|------------------|---------|----------|----------|---------------|-----------|--------------------|
| <b>No covariates</b>                                              |                   |                  |         |          |          |               |           |                    |
| 1                                                                 | Balboa            | 2013-2015        | p<0.01  | 5,846    | 1,270.83 | 5.1           | 5         | 368,341            |
| 2                                                                 | Santa Maria       | 2015-2017        | p<0.01  | 2,013    | 482.25   | 4.3           | 3         | 139,778            |
| 3                                                                 | Colon             | 2009             | p<0.01  | 1,402    | 237.54   | 6             | 1         | 206,553            |
| 4                                                                 | Changuinola       | 2005-2007        | p<0.01  | 1,734    | 394.85   | 4.5           | 2         | 114,445            |
| 5                                                                 | Capira            | 2014             | p<0.01  | 1,914    | 721.3    | 2.7           | 9         | 627,220            |
| <b>Adjusting for <i>Aedes</i> presence &amp; absence</b>          |                   |                  |         |          |          |               |           |                    |
| 1                                                                 | Balboa            | 2013-2015        | p<0.01  | 5,846    | 1,670.20 | 3.8           | 5         | 368,341            |
| 2                                                                 | Baru              | 2009             | p<0.01  | 2,019    | 408.4    | 5.1           | 11        | 492,942            |
| 3                                                                 | Colon             | 2009             | p<0.01  | 1,402    | 188.2    | 7.4           | 1         | 206,553            |
| 4                                                                 | Calobre           | 2015-2017        | p<0.01  | 2,120    | 511.5    | 4.1           | 4         | 162,315            |
| 5                                                                 | Arraijan          | 2005-2006        | p<0.01  | 1,923    | 608      | 3.2           | 1         | 220,779            |
| <b>Adjusting for <i>Ae. albopictus</i> presence &amp; absence</b> |                   |                  |         |          |          |               |           |                    |
| 1                                                                 | Balboa            | 2013-2015        | p<0.01  | 5,846    | 1,636.70 | 3.9           | 5         | 368,341            |
| 2                                                                 | Colon             | 2009             | p<0.01  | 1,402    | 178.4    | 8             | 1         | 206,553            |
| 3                                                                 | Changuinola       | 2005-2007        | p<0.01  | 1,734    | 296.5    | 6             | 2         | 114,445            |
| 4                                                                 | Santa Maria       | 2015-2017        | p<0.01  | 2,013    | 445      | 4.6           | 3         | 139,778            |
| 5                                                                 | Arraijan          | 2005-2006        | p<0.01  | 1,923    | 591.4    | 3.3           | 1         | 220,779            |
| <b>Adjusting for <i>Ae. aegypti</i> presence &amp; absence</b>    |                   |                  |         |          |          |               |           |                    |

|   |         |           |        |       |          |     |    |         |
|---|---------|-----------|--------|-------|----------|-----|----|---------|
| 1 | Balboa  | 2013-2015 | p<0.01 | 5,846 | 1,318.90 | 4.9 | 5  | 368,341 |
| 2 | Colobre | 2015-2017 | p<0.01 | 2,019 | 544.6    | 4   | 4  | 162,315 |
| 3 | Colon   | 2009      | p<0.01 | 1,402 | 247.2    | 5.8 | 1  | 206,553 |
| 4 | Baru    | 2009      | p<0.01 | 2,120 | 535.3    | 3.9 | 11 | 492,942 |
| 5 | Capira  | 2014      | p<0.01 | 1,923 | 745.9    | 3.1 | 10 | 652,859 |

227

228 **Table 2. Characteristics of each space-time model**

| Model                      | Total number of districts | RR 0-1 (# of districts) | RR > 1 (# of districts) | Highest RR           | Most observed cases    |
|----------------------------|---------------------------|-------------------------|-------------------------|----------------------|------------------------|
| No covariates              | 20                        | 9                       | 11                      | Bocas Del Toro (5.2) | San Miguelito (13,109) |
| Both <i>Aedes</i> species  | 22                        | 12                      | 10                      | Santiago (2.9)       | San Miguelito (13,109) |
| Only <i>Ae. albopictus</i> | 12                        | 4                       | 8                       | Bocas del Toro (6.2) | San Miguelito (13,109) |
| Only <i>Ae. aegypti</i>    | 31                        | 17                      | 14                      | San Miguelito (3.3)  | San Miguelito (13,109) |

229

230 **Fig 2. Space-time clusters of dengue fever without adjusting for *Aedes* presence and absence in**  
 231 **Panama (A); Relative risk for districts belonging to a significant space-time cluster (B). Map**  
 232 **created using ArcGIS [30] and data from The Panamanian Ministry of Health.**

233

234 **Fig 3. Space-time clusters of dengue that adjusts for both *Aedes* species presence and absence in**  
 235 **Panama (A); Relative risk for districts belonging to a significant space-time cluster (B). Map**  
 236 **created using ArcGIS [30] and data from The Panamanian Ministry of Health.**

237

238 **Fig 4. Space-time clusters of dengue fever that adjusts for *Ae. albopictus* presence and absence in**  
 239 **Panama (A); Relative risk for districts belonging to a significant space-time cluster (B). Map**  
 240 **created using ArcGIS [30] and data from The Panamanian Ministry of Health.**

241

242 **Fig 5. Space-time clusters of dengue fever that adjusts for *Ae. aegypti* presence and absence in**  
 243 **Panama (A); Relative risk for districts belonging to a significant space-time cluster (B). Map**  
 244 **created using ArcGIS [30] and data from The Panamanian Ministry of Health.**

245

246 The results of our GLM indicate that dengue PR can be predicted by the presence of *Ae. aegypti*  
 247 alone, with all other covariates exhibiting insignificant statistical relationships to PR ( $P > 0.05$ ), with  
 248 covariate selection employed. Thus, controlling for all other factors, districts with a presence of solely

249 *Ae. aegypti* exhibited an increase in adjusted PR of 1.0933 ( $P = 0.001$ ). Additionally, the presence of *Ae.*  
250 *albopictus* did not predict the presence of *Ae. aegypti* ( $P > 0.05$ ).

251

## 252 **Discussion**

253 Our non-spatial statistical testing complements the space-time models, highlighting the likely  
254 role of *Ae. aegypti* in dengue transmission dynamics across Panama as well as the need to incorporate  
255 vector data into systematic dengue risk projections. In the model where *Ae. aegypti* presence and  
256 absence was accounted for, more than double the number of districts were contained in clusters than the  
257 model where *Ae. albopictus* presence and absence was accounted for. The *Ae. aegypti* model also  
258 contained the highest number of districts with a relative risk  $> 1$ , indicating more dengue cases than  
259 would be expected given baseline population levels. Findings are further supported by our determination  
260 that *Ae. aegypti* is the only predictor of dengue PR in the non-spatial model, which holds important  
261 implications for the understanding of dengue transmission dynamics in the changing landscape of vector  
262 ecology. As an invasive species that has systematically replaced *Ae. aegypti* throughout numerous  
263 regions in its endemic range [14], *Ae. albopictus* has been spreading throughout Panama for the previous  
264 13 years [12,13]. Our results illustrate that it has not been a key driver of dengue prevalence throughout  
265 its time occurring in the country, but that more importantly, there is reason to believe that dengue rates  
266 may decrease as the species further proliferates, extirpating *Ae. aegypti* from its resident range within  
267 Panama. Globally, while *Ae. albopictus* has been implicated in several small outbreaks [35], the majority  
268 of dengue serotypes are thought to be transmitted by *Ae. aegypti*, due to its preference for both  
269 urbanized habitat [16,36] and human hosts [37,38].

270 Perhaps curious is the lack of association found with the other covariates, which included the  
271 presence and absence of *Ae. albopictus*, coexistence of both species, and the three socioeconomic  
272 variables. There have been a number of studies addressing the vector status and potential of *Ae.*

273 *albopictus*. While it is biologically capable of transmitting dengue fever [6], outbreaks that can be  
274 directly attributed to this species are rare [35,39–41]. The lack of contribution of socioeconomic  
275 variables is also interesting, given socioeconomic conditions have been found to influence vector  
276 distribution [42–44]. However, no clear connection has been found between dengue risk and particular  
277 socioeconomic conditions [45], thus supporting our results. Overall, based on our findings, we suggest  
278 that vector surveillance results be incorporated into vector control planning. Specifically, focusing on  
279 regions where *Ae. aegypti* still maintains a stronghold may be an effective way of combating dengue  
280 outbreaks. Balboa, for example, was identified as a cluster in all four models and had a steady presence  
281 of *Ae. aegypti* throughout the sample period as well as increasing presence of *Ae. albopictus* since 2006.  
282 This district is relatively rural with approximately 2400 people spread across 400km<sup>2</sup> area. It is possible  
283 that vector control efforts in Balboa are not as frequent or efficacious as in the more populated regions,  
284 yet this hypothesis would require field testing to confirm. Another district, San Miguelito in  
285 metropolitan Panama City, contained the most observed cases during our study period, despite being  
286 only 49.9km<sup>2</sup>. This district can be characterized by high density housing and residents of relatively low  
287 socioeconomic status. The staggering number of cases should be a cause for concern, yet its small  
288 geographic area may facilitate public health interventions such as vector control and community  
289 education. Overall, now that the identification of high risk districts at the national scale has been  
290 completed and informed by vector presence, the subsequent step of illustrating the comparative  
291 characteristics of each district relative to dengue transmission risk can be undertaken. Understanding  
292 what caused Balboa and San Miguelito to experience such high relative risk, for example, is the next  
293 task necessary for adjusting public health interventions to effectively address the needs and conditions of  
294 each district.

295         Despite the longevity of our data and thoroughness of the surveillance efforts, there are clear  
296 considerations and limitations of our work which we would like to see addressed in future studies. First,

297 it is possible that the reported cases of dengue in certain districts are travel cases (seeking treatment in a  
298 district different than actual residence), therefore, adjusting for the presence of *Aedes* can shed light on  
299 the districts where an individual is more likely to get infected with dengue, not necessarily where all  
300 total cases were recorded. The lack of population data for more than one year across such a lengthy  
301 period is a considerable shortcoming of this work. While the frequency of a census in Panama is on par  
302 with much of Latin America, this greatly impacts our ability to determine accurate prevalence rates year  
303 to year. Since linear interpolation is often inaccurate for non-linear trends like population growth rate,  
304 we would like to see more frequent population assessments conducted in regions where dengue is an  
305 ongoing risk, and while we understand that resources may not easily allow for this, the role of national  
306 census efforts in public health is often under-appreciated. Second, the cylindrical shape of the clusters  
307 does not represent the true shape of the clusters, while it is possible to use irregular search windows [46–  
308 48]. Third, the STSS reports the relative risk for the entire study period, while relative risk will likely  
309 vary temporally. A final core limitation is the vector surveillance methods employed. Values are  
310 reported as the number of houses containing larvae of each respective species. No information is given  
311 on the number of houses surveyed, and thus we were forced to transform the data into presence and  
312 absence. Had the total number of surveyed houses been reported, we would have been able to compute  
313 each district's infestation rate, which would have provided a scaled and more nuanced independent  
314 variable to compare to dengue PR.

315 Overall, it is key to recognize that adding vector surveillance data as a covariate changes the  
316 location, duration, and relative risk of dengue case clusters. Although unadjusted cluster analysis is a  
317 valuable tool for public health officials to identify high risk areas of vector-borne disease, our study  
318 illustrates the role that incorporating relevant covariates can play in altering the model output. While this  
319 has been demonstrated in cancer [49,50], this is the first use of covariates in space-time cluster detection  
320 modelling of neglected tropical disease. With this comes potential to expand into other classes of

321 covariates. For example, in addition to vector surveillance data, we support the incorporation of  
322 additional covariates such as vector genetic background, climate, vegetation, and land cover to dengue  
323 cluster models. Furthermore, the differences reported for the clusters of dengue after adjusting for vector  
324 presence merit further small-area studies to determine local-scale characteristics that may assist in  
325 targeted intervention campaigns. Vector surveillance clearly provides valuable information in the  
326 determination of virus case clusters, and thus should be conducted alongside virus surveillance so that it  
327 may be included in modelling efforts. We intend for this exploratory study to inspire future  
328 investigations into the vector status of *Ae. albopictus* as well as the role of vector surveillance in public  
329 health planning efforts. We hope Panama's robust dengue surveillance program can stand as a model for  
330 practitioners elsewhere, where current surveillance may be less thorough.

331

## 332 **Acknowledgements**

333 We acknowledge Project Mosaic at the University of North Carolina at Charlotte for their  
334 assistance in data analysis. We also acknowledge Dr. Owen McMillan at the Smithsonian Tropical  
335 Research Institute (STRI), who oversaw the project and its administrative responsibilities. We thank  
336 the staff of the Department of Statistics and Vector Control of MINSA for providing entomological data  
337 on *Aedes* mosquitoes as well as case counts for dengue fever across Panama over the study period. We  
338 are grateful to Panama's Environmental Authority (*Mi Ambiente*, formerly ANAM) for supporting  
339 scientific collecting of mosquitoes.

340

## 341 **Funding**

342 This work was partially supported by Secretaria Nacional de Ciencia, Tecnología e Innovación  
343 de Panamá (SENACYT- IDDS15\_047) to JRL, <http://www.senacyt.gob.pa/>. JRL also further supported

344 by SENACYT's National Research Investigation System (SNI). The funders had no role in study design,  
345 data collection and analysis, decision to publish, or preparation of the manuscript.

346

347

## 348 **References**

- 349 1. Bhatt S, Gething PW, Brady OJ, Messina JP, Farlow AW, Moyes CL, et al. The global  
350 distribution and burden of dengue. *Nature*. 2013. doi:10.1038/nature12060
- 351 2. World Health Organization (WHO). Dengue and severe dengue. WHO Fact Sheet. 2012.  
352 doi:10.1111/1469-0691.12442
- 353 3. Morin CW, Comrie AC, Ernst K. Climate and dengue transmission: Evidence and implications.  
354 *Environmental Health Perspectives*. 2013. pp. 1264–1272. doi:10.1289/ehp.1306556
- 355 4. Knudsen a B, Slooff R. Vector-borne disease problems in rapid urbanization: new approaches to  
356 vector control. *Bull World Health Organ*. 1992;70: 1–6.
- 357 5. Gubler DJ. The Global Threat of Emergent/Re-emergent Vector-Borne Diseases. *Vector Biology,*  
358 *Ecology and Control*. 2010. pp. 39–62. doi:10.1007/978-90-481-2458-9\_4
- 359 6. Christofferson RC. A reevaluation of the role of aedes albopictus in dengue transmission. *J Infect*  
360 *Dis*. 2015;212: 1177–1179. doi:10.1093/infdis/jiv174
- 361 7. Vazquez-Prokopec GM, Chaves LF, Ritchie SA, Davis J, Kitron U. Unforeseen costs of cutting  
362 mosquito surveillance budgets. *PLoS Negl Trop Dis*. 2010;4. doi:10.1371/journal.pntd.0000858
- 363 8. Guzmán MG, Kourí G. Dengue diagnosis, advances and challenges. *International Journal of*  
364 *Infectious Diseases*. 2004. doi:10.1016/j.ijid.2003.03.003
- 365 9. Morrison AC, Zielinski-Gutierrez E, Scott TW, Rosenberg R. Defining challenges and proposing



- 366 solutions for control of the virus vector *Aedes aegypti*. PLoS Medicine. 2008. pp. 0362–0366.  
367 doi:10.1371/journal.pmed.0050068
- 368 10. World Bank. World Health Organization Global Health Expenditure database. In: World Bank  
369 Group - Open Knowledge Repository. 2016.
- 370 11. Kay B. Dengue vector surveillance and control. Curr Opin Infect Dis. 1999;12: 425–432.  
371 doi:10.1097/00001432-199910000-00003
- 372 12. Miller MJ, Loaiza JR. Geographic Expansion of the Invasive Mosquito *Aedes albopictus* across  
373 Panama—Implications for Control of Dengue and Chikungunya Viruses. PLoS Negl Trop Dis.  
374 2015; doi:10.1371/journal.pntd.0003383
- 375 13. Eskildsen GA, Rovira JR, Smith O, Miller MJ, Bennett KL, McMillan WO, et al. Maternal  
376 invasion history of *Aedes aegypti* and *Aedes albopictus* into the Isthmus of Panama: Implications  
377 for the control of emergent viral disease agents. PLoS One. 2018;  
378 doi:10.1371/journal.pone.0194874
- 379 14. O’Meara GF, Evans LF, Gettman a D, Cuda JP. Spread of *Aedes albopictus* and decline of *Ae.*  
380 *aegypti* (Diptera: Culicidae) in Florida. J Med Entomol. 1995;32: 554–562.  
381 doi:10.1073/pnas.1303395110
- 382 15. Bagny Beilhe L, Arnoux S, Delatte H, Lajoie G, Fontenille D. Spread of invasive *Aedes*  
383 *albopictus* and decline of resident *Aedes aegypti* in urban areas of Mayotte 2007-2010. Biol  
384 Invasions. 2012;14: 1623–1633. doi:10.1007/s10530-012-0177-1
- 385 16. Leisnham PT, LaDeau SL, Juliano SA. Spatial and temporal habitat segregation of mosquitoes in  
386 Urban Florida. PLoS One. 2014;9. doi:10.1371/journal.pone.0091655
- 387 17. Rueda LM. Pictorial keys for the identification of mosquitoes (Diptera: Culicidae) associated with

- 388 Dengue Virus Transmission. *Zootaxa*. 2004; doi:10.11646/zootaxa.589.1.1
- 389 18. Kulldorff M, Heffernan R, Hartman J, Assunção R, Mostashari F. A space-time permutation scan  
390 statistic for disease outbreak detection. *PLoS Med*. 2005; doi:10.1371/journal.pmed.0020059
- 391 19. Li Z, Yin W, Clements A, Williams G, Lai S, Zhou H, et al. Spatiotemporal analysis of  
392 indigenous and imported dengue fever cases in Guangdong province, China. *BMC Infect Dis*.  
393 2012; doi:10.1186/1471-2334-12-132
- 394 20. Banu S, Hu W, Hurst C, Guo Y, Islam MZ, Tong S. Space-time clusters of dengue fever in  
395 Bangladesh. *Trop Med Int Heal*. 2012;17: 1086–1091. doi:10.1111/j.1365-3156.2012.03038.x
- 396 21. Dhewantara PW, Ruliansyah A, Fuadiyah MEA, Astuti EP, Widawati M, Widawati M. Space-  
397 time scan statistics of 2007-2013 dengue incidence in Cimahi city, Indonesia. *Geospat Health*.  
398 2015; doi:10.4081/gh.2015.373
- 399 22. Nsoesie EO, Ricketts RP, Brown HE, Fish D, Durham DP, Ndeffo Mbah ML, et al. Spatial and  
400 temporal clustering of chikungunya virus transmission in dominica. *PLoS Negl Trop Dis*. 2015;  
401 doi:10.1371/journal.pntd.0003977
- 402 23. Gaudart J, Poudiougou B, Dicko A, Ranque S, Toure O, Sagara I, et al. Space-time clustering of  
403 childhood malaria at the household level: A dynamic cohort in a Mali village. *BMC Public*  
404 *Health*. 2006; doi:10.1186/1471-2458-6-286
- 405 24. Coleman M, Coleman M, Mabuza AM, Kok G, Coetzee M, Durrheim DN. Using the SaTScan  
406 method to detect local malaria clusters for guiding malaria control programmes. *Malar J*. 2009;8:  
407 68. doi:10.1186/1475-2875-8-68
- 408 25. Yoshioka K, Tercero D, Pérez B, Nakamura J, Pérez L. Implementing a vector surveillance-  
409 response system for chagas disease control: A 4-year field trial in Nicaragua. *Infect Dis Poverty*.

- 410 2017; doi:10.1186/s40249-016-0225-7
- 411 26. Lian M, Warner RD, Alexander JL, Dixon KR. Using geographic information systems and spatial  
412 and space-time scan statistics for a population-based risk analysis of the 2002 equine West Nile  
413 epidemic in six contiguous regions of Texas. *Int J Health Geogr.* 2007; doi:10.1186/1476-072X-  
414 6-42
- 415 27. Mulatti P, Mazzucato M, Montarsi F, Ciocchetta S, Capelli G, Bonfanti L, et al. Retrospective  
416 space-time analysis methods to support West Nile virus surveillance activities. *Epidemiol Infect.*  
417 2015; doi:10.1017/S0950268814000442
- 418 28. Desjardins MR, Whiteman A, Casas I, Delmelle E. Space-time clusters and co-occurrence of  
419 chikungunya and dengue fever in Colombia from 2015 to 2016. *Acta Trop.* 2018;  
420 doi:10.1016/j.actatropica.2018.04.023
- 421 29. Kleinman KP, Abrams AM, Kulldorff M, Platt R. A model-adjusted space - Time scan statistic  
422 with an application to syndromic surveillance. *Epidemiol Infect.* 2005;  
423 doi:10.1017/S0950268804003528
- 424 30. ESRI. ArcGIS Desktop: Release 10.2. Redlands CA. 2013.
- 425 31. Mccullagh P, Nelder J. Generalized linear models. *Journal of the Royal Statistical Society.* ....  
426 1972. doi:10.1007/978-1-4899-3242-6
- 427 32. Carbajo AE, Curto SI, Schweigmann NJ. Spatial distribution pattern of oviposition in the  
428 mosquito *Aedes aegypti* in relation to urbanization in Buenos Aires: southern fringe bionomics of  
429 an introduced vector. *Med Vet Entomol.* 2006;20: 209–218. doi:10.1111/j.1365-  
430 2915.2006.00625.x
- 431 33. Wang J, Ogden NH, Zhu H. The Impact of Weather Conditions on *Culex pipiens* and *Culex*

- 432 restuans (Diptera: Culicidae) Abundance: A Case Study in Peel Region. *J Med Entomol.* 2011;  
433 doi:10.1603/ME10117
- 434 34. Chansang C, Kittayapong P. Application of mosquito sampling count and geospatial methods to  
435 improve dengue vector surveillance. *Am J Trop Med Hyg.* 2007; doi:77/5/897 [pii]
- 436 35. Effler P V., Pang L, Kitsutani P, Vorndam V, Nakata M, Ayers T, et al. Dengue fever, Hawaii,  
437 2001-2002. *Emerging Infectious Diseases.* 2005. doi:10.3201/eid1105.041063
- 438 36. Alarcon EP, Segura AM, Rua-Uribe G, Parra-Henao G. Ovitrap evaluation for surveillance and  
439 control of *Aedes aegypti* in two urban settlements of Uraba, Antioquia. *Biomedica.* 2014;34: 409–  
440 424. doi:10.7705/biomedica.v34i3.2134
- 441 37. Farjana T, Tuno N, Atkinson D, Boreham PFL, Garrett-Jones C, Briegel H, et al. Multiple blood  
442 feeding and host-seeking behavior in *Aedes aegypti* and *Aedes albopictus* (Diptera: Culicidae). *J*  
443 *Med Entomol.* The Oxford University Press; 2013;50: 838–46. doi:10.1603/me12146
- 444 38. Ponlawat A, Harrington LC. Blood Feeding Patterns of *Aedes aegypti* and *Aedes albopictus* in  
445 Thailand. *J Med Entomol.* 2005;42: 844–849. doi:10.1603/0022-  
446 2585(2005)042[0844:BFPOAA]2.0.CO;2
- 447 39. Gratz NG. Critical review of the vector status of *Aedes albopictus*. *Med Vet Entomol.* Blackwell  
448 Science Ltd; 2004;18: 215–227. doi:10.1111/j.0269-283X.2004.00513.x
- 449 40. Maimusa AH, Ahmad AH, Kassim NFA, Ahmad H, Dieng H, Rahim J. Contribution of public  
450 places in proliferation of dengue vectors in Penang Island, Malaysia. *Asian Pac J Trop Biomed.*  
451 Elsevier B.V.; 2017;7: 183–187. doi:10.1016/j.apjtb.2016.12.017
- 452 41. Paupy C, Ollomo B, Kamgang B, Moutailler S, Rousset D, Demanou M, et al. Comparative role  
453 of *Aedes albopictus* and *Aedes aegypti* in the emergence of Dengue and Chikungunya in central

- 454 Africa. *Vector Borne Zoonotic Dis.* 2010;10: 259–266. doi:10.1089/vbz.2009.0005
- 455 42. Little E, Biehler D, Leisnham PT, Jordan R, Wilson S, Ladeau SL. Socio-Ecological Mechanisms  
456 Supporting High Densities of *Aedes albopictus* (Diptera: Culicidae) in Baltimore, MD. 2017; 1–  
457 10. doi:10.1093/jme/tjx103
- 458 43. LaDeau SL, Leisnham PT, Biehler D, Bodner D. Higher mosquito production in low-income  
459 neighborhoods of Baltimore and Washington, DC: Understanding ecological drivers and  
460 mosquito-borne disease risk in temperate cities. *Int J Environ Res Public Health.* 2013;  
461 doi:10.3390/ijerph10041505
- 462 44. Whiteman A, Delmelle E, Rapp T, Chen S, Chen G, Dulin M. A Novel Sampling Method to  
463 Measure Socioeconomic Drivers of *Aedes Albopictus* Distribution in Mecklenburg County, North  
464 Carolina. *Int J Environ Res Public Health.* 2018;15: 2179. doi:10.3390/ijerph15102179
- 465 45. Mulligan K, Dixon J, Joanna Sinn C-L, Elliott SJ. Is dengue a disease of poverty? A systematic  
466 review. *Pathog Glob Health.* 2015; doi:10.1179/2047773214Y.0000000168
- 467 46. Duczmal L, Assunção R. A simulated annealing strategy for the detection of arbitrarily shaped  
468 spatial clusters. *Comput Stat Data Anal.* 2004; doi:10.1016/S0167-9473(02)00302-X
- 469 47. Tango T, Takahashi K. A flexibly shaped spatial scan statistic for detecting clusters. *Int J Health  
470 Geogr.* 2005; doi:10.1186/1476-072X-4-11
- 471 48. Ullah S, Daud H, Dass SC, Khan HN, Khalil A. Detecting space-time disease clusters with  
472 arbitrary shapes and sizes using a co-clustering approach. *Geospat Health.* 2017;  
473 doi:10.4081/gh.2017.567
- 474 49. Sheehan TJ, DeChello LM, Kulldorff M, Gregorio DI, Gershman S, Mroszczyk M. The  
475 geographic distribution of breast cancer incidence in Massachusetts 1988 to 1997, adjusted for

- 476 covariates. *Int J Health Geogr.* 2004; doi:10.1186/1476-072X-3-17
- 477 50. Klassen AC, Kulldorff M, Curriero F. Geographic clustering of prostate cancer grade and stage at  
478 diagnosis, before and after adjustment for risk factors. *Int J Health Geogr.* 2005;  
479 doi:10.1186/1476-072X-4-1
- 480
- 481
- 482
- 483
- 484

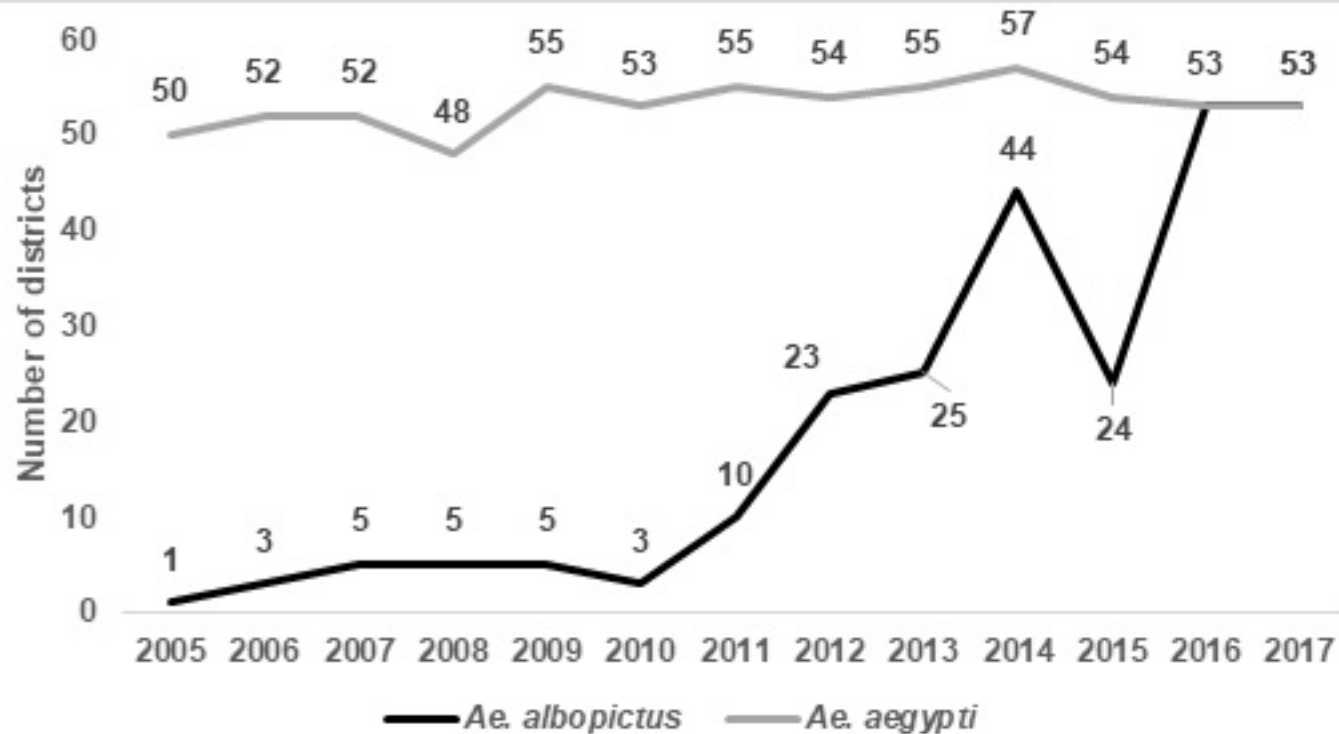

Figure 1



**A**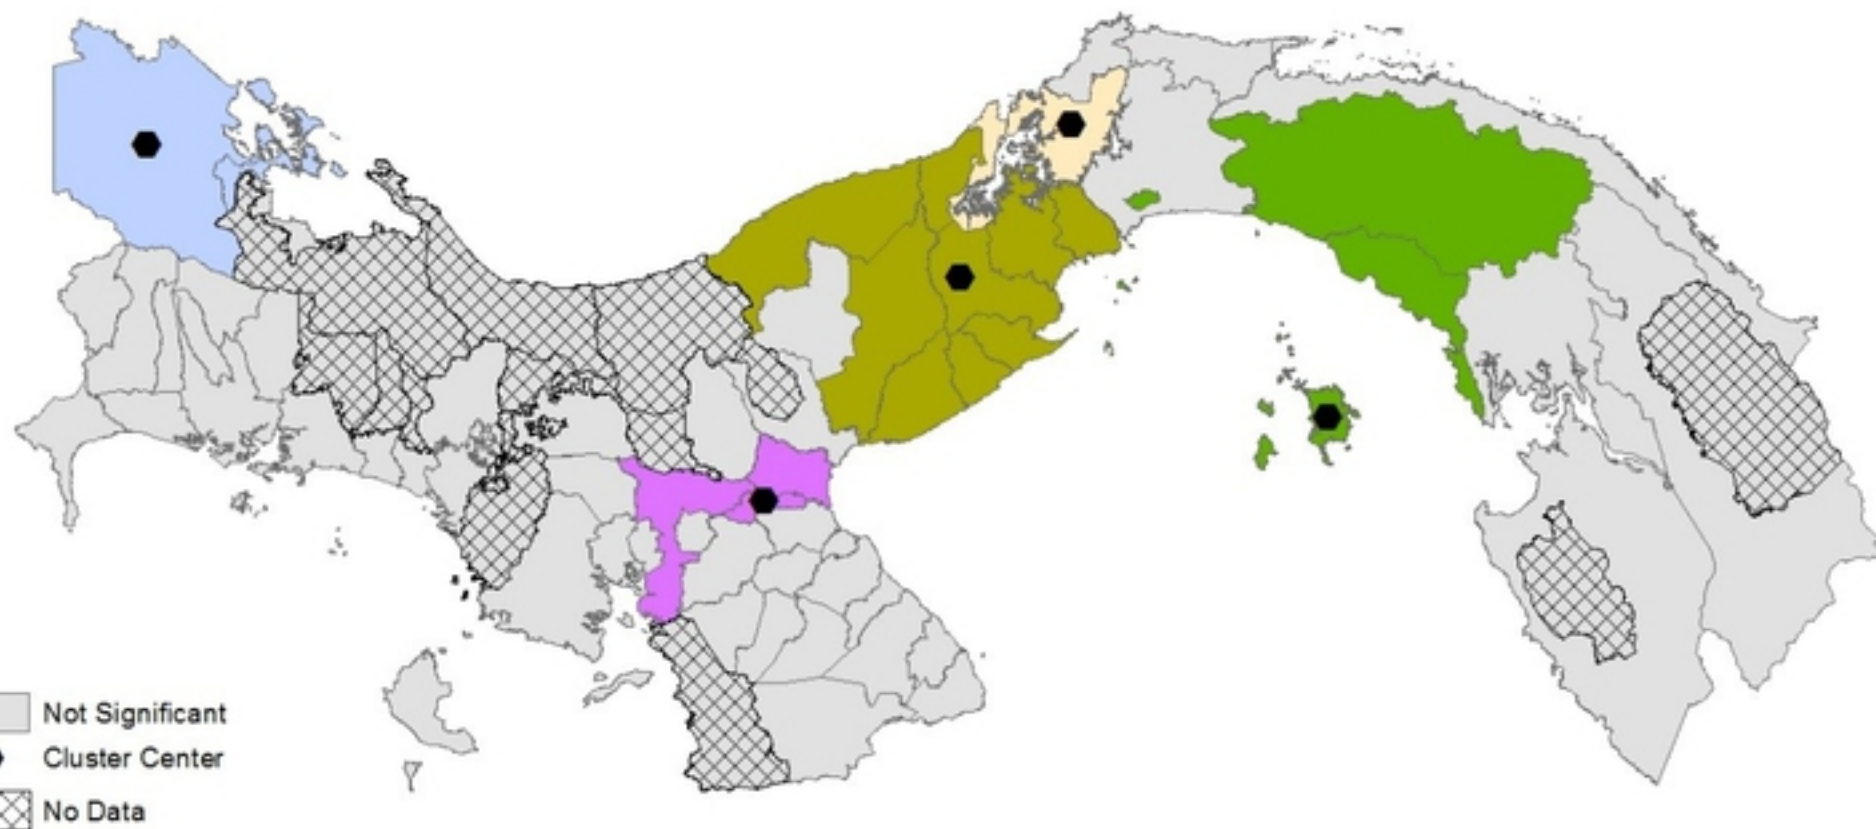**B**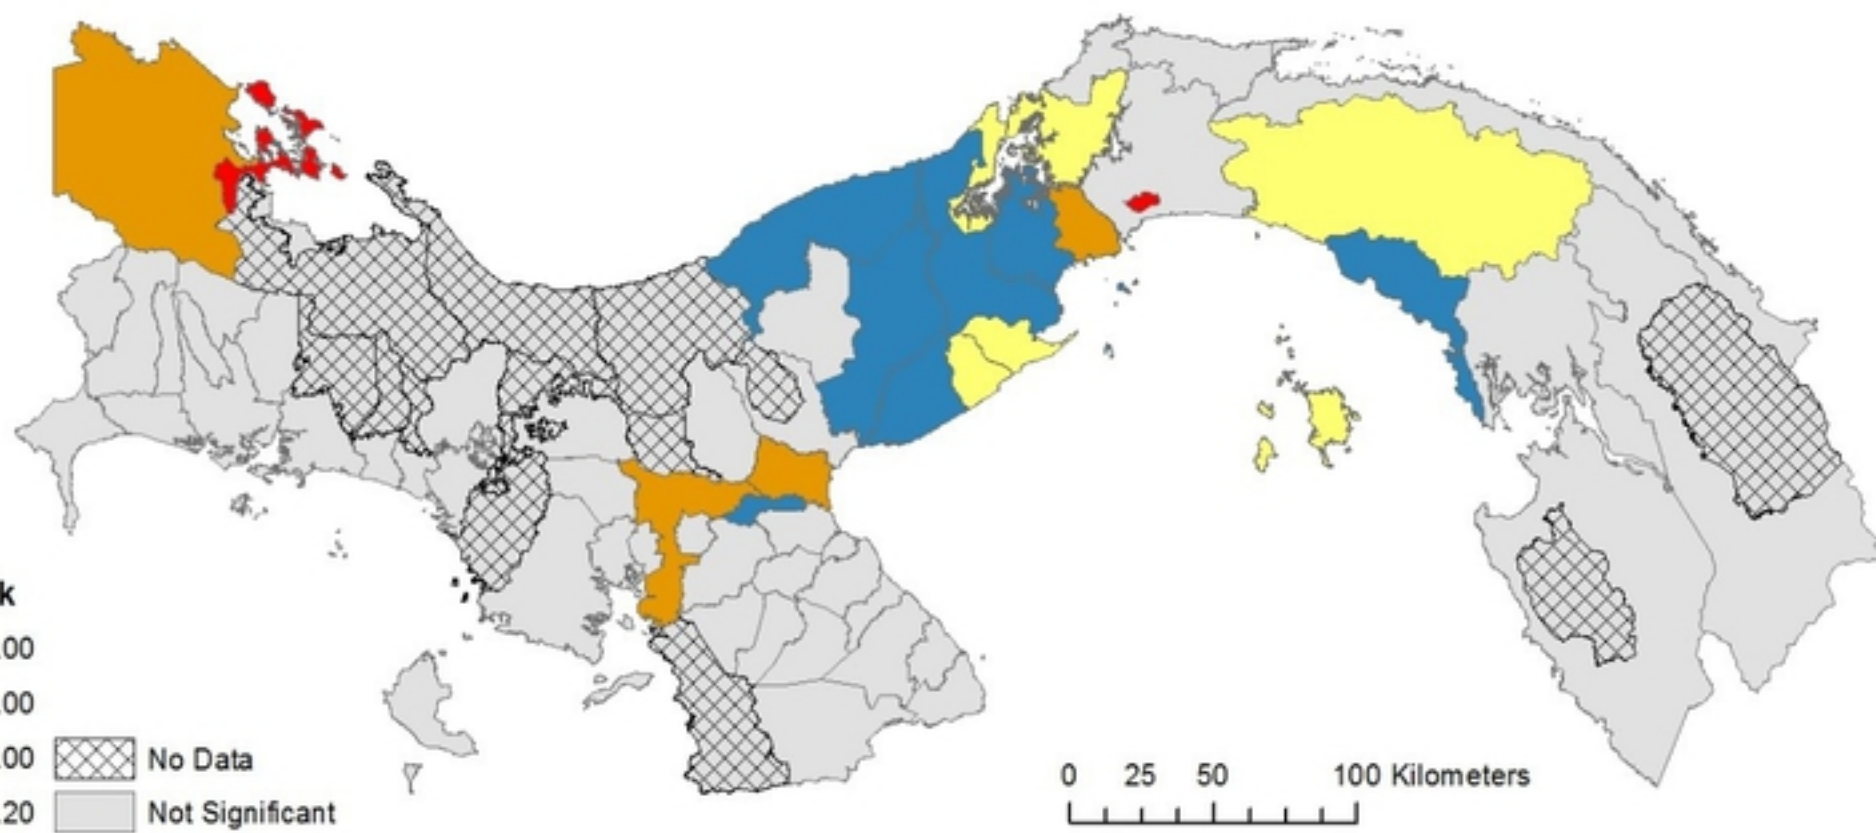**Figure 2**



**A**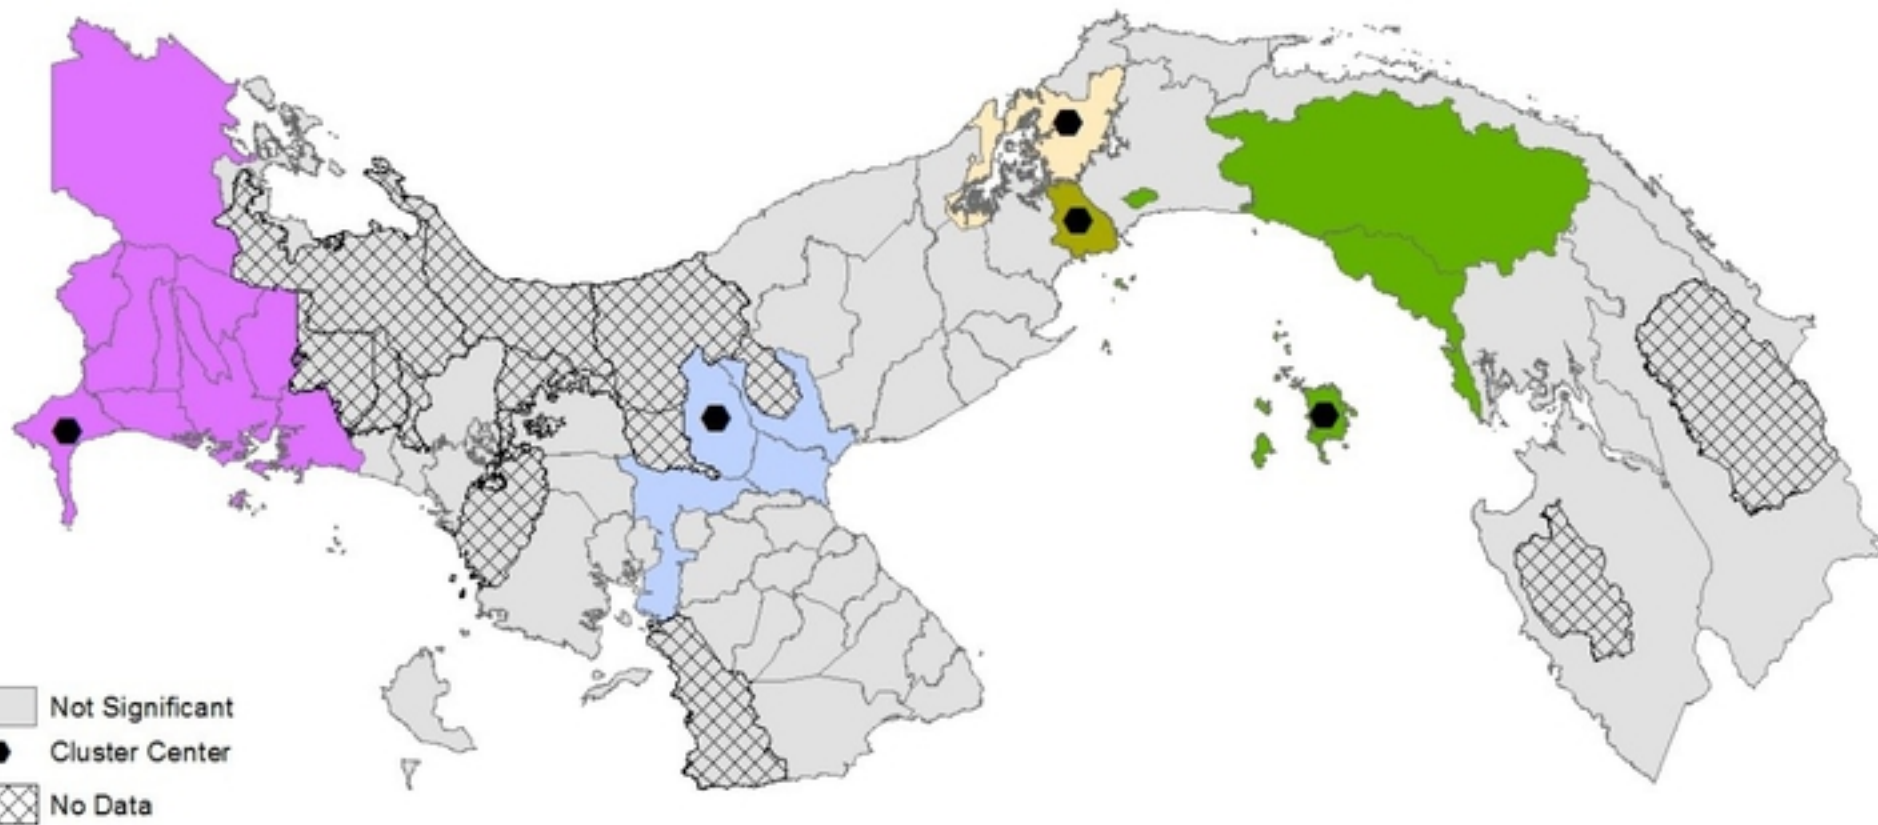**B**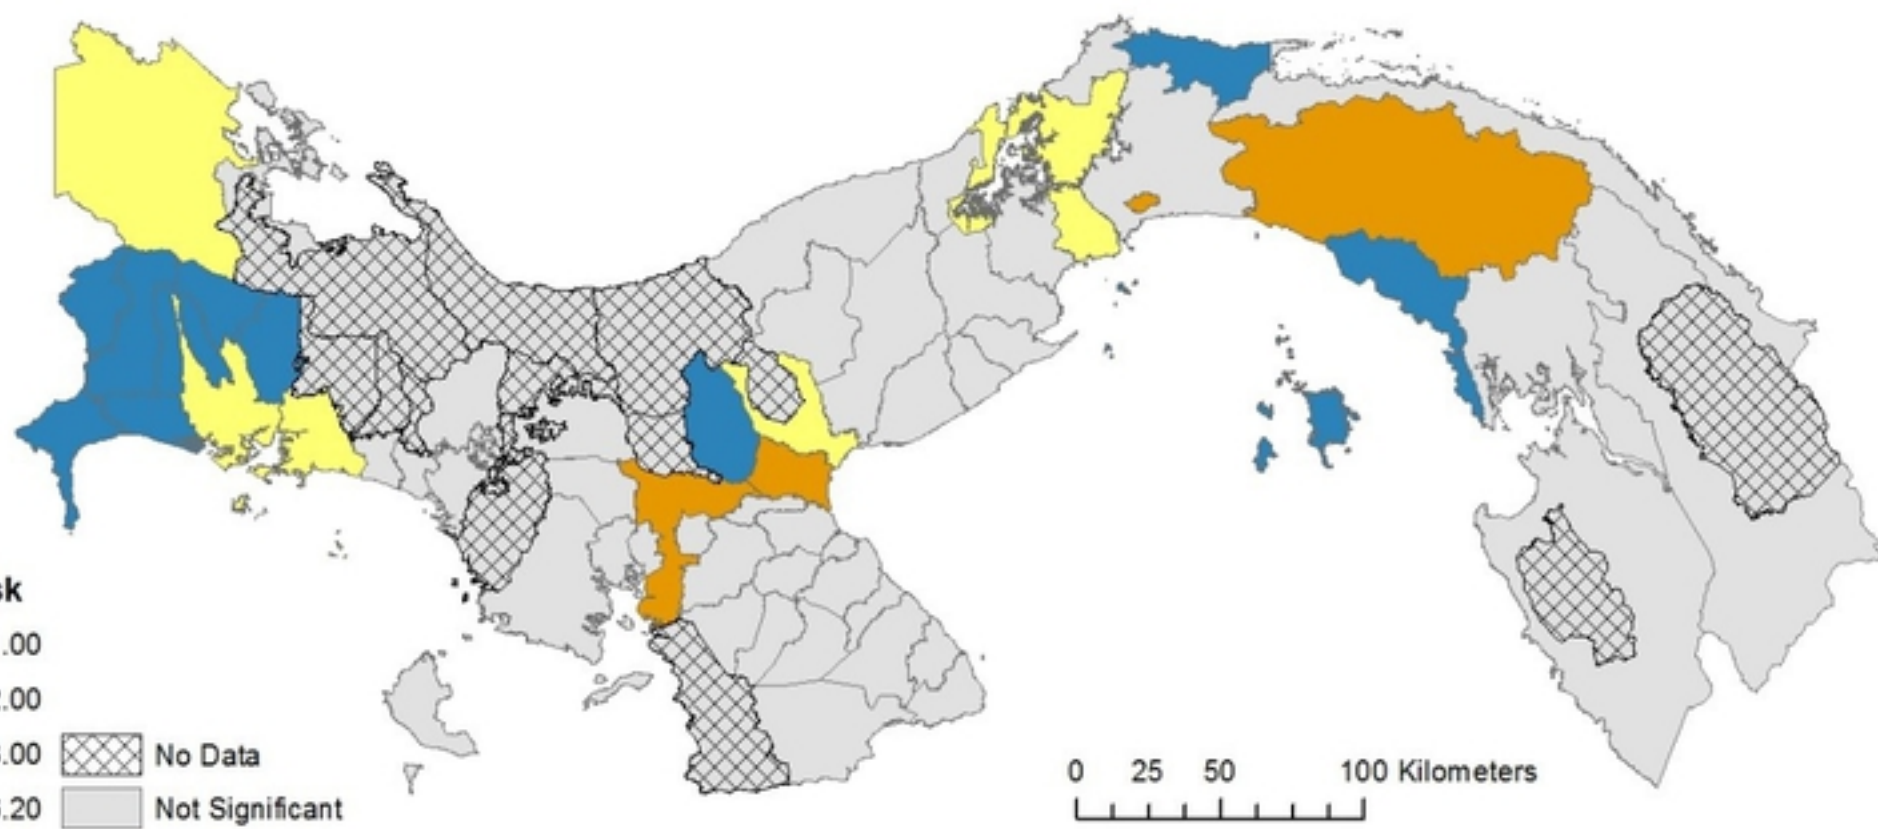**Figure 3**

A

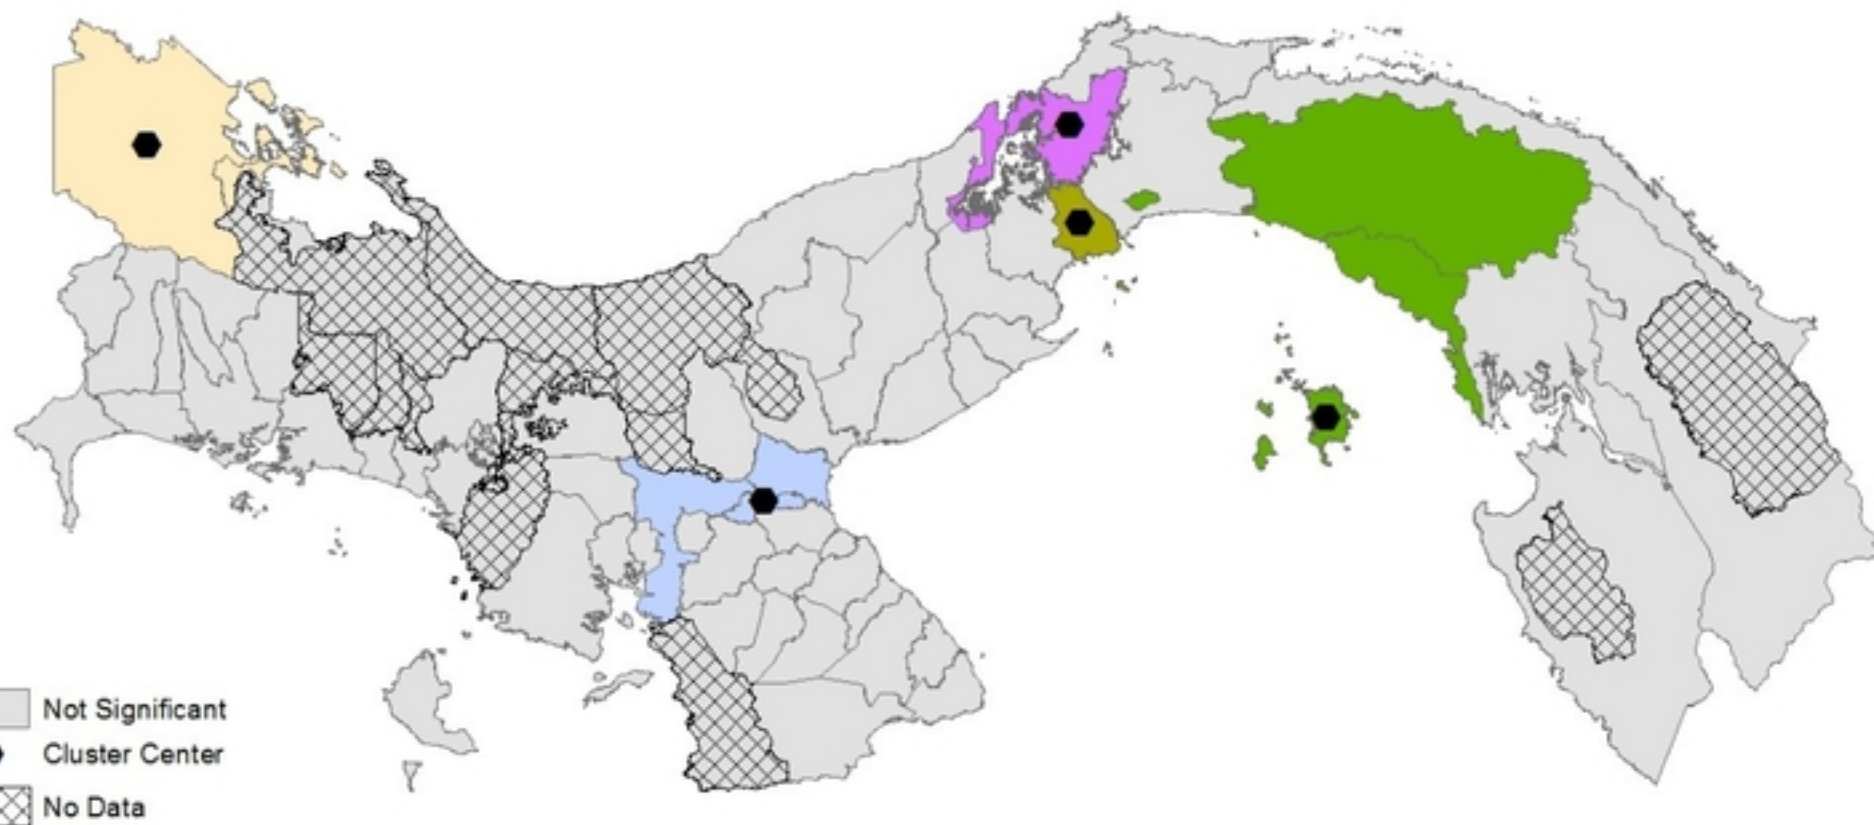

B

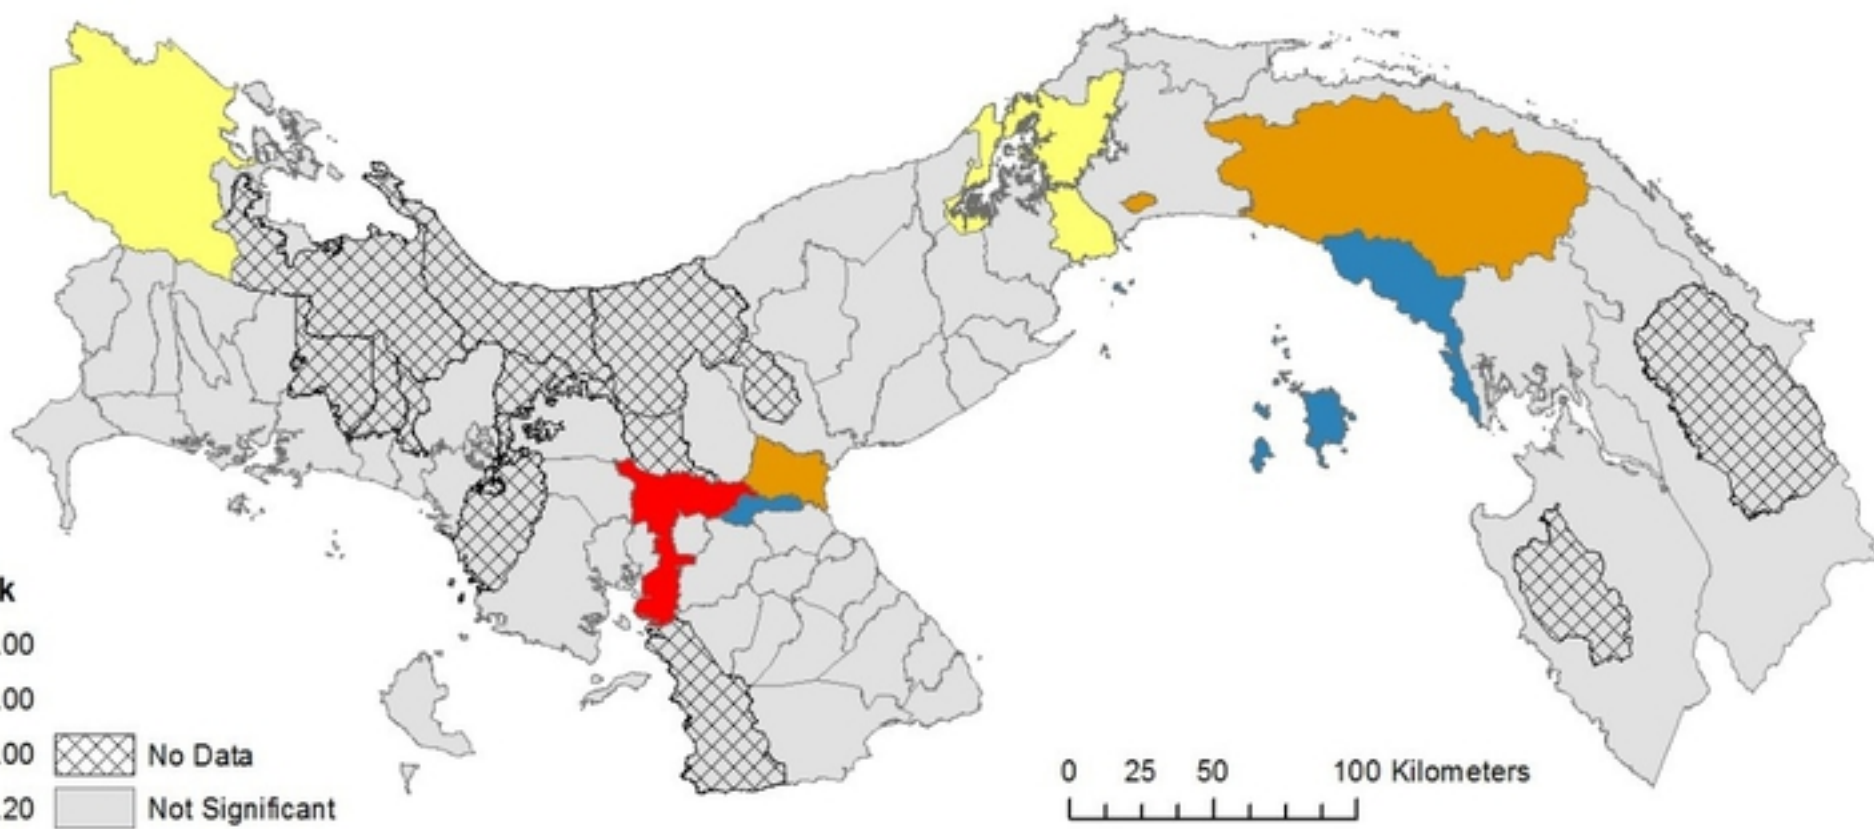

Figure 4



A

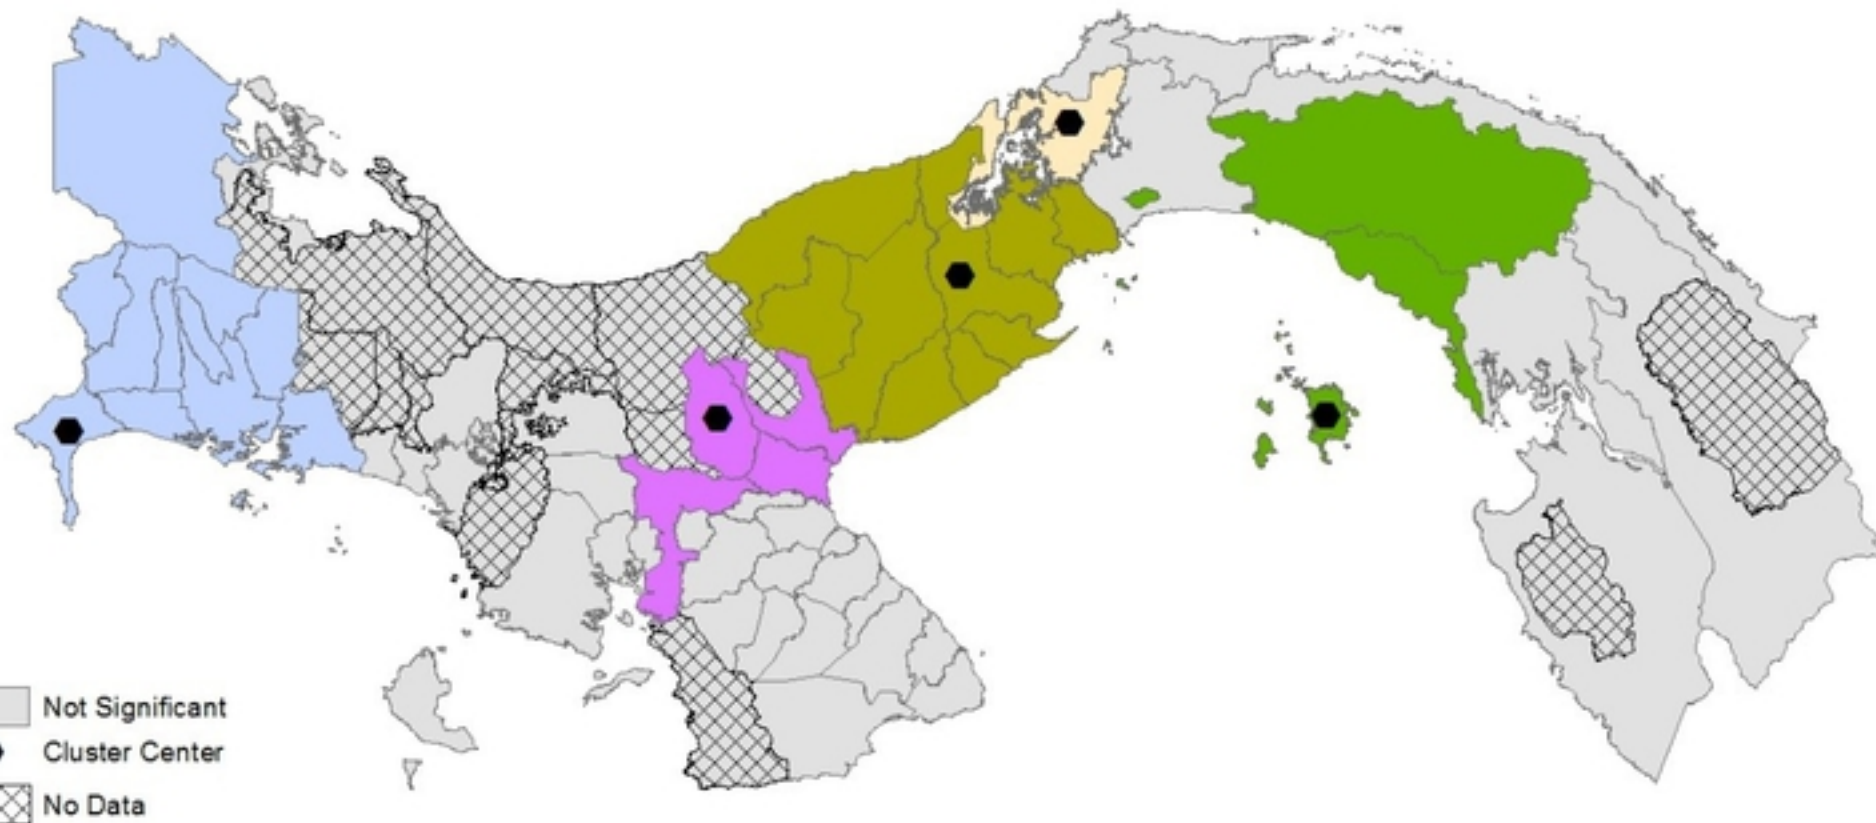

B

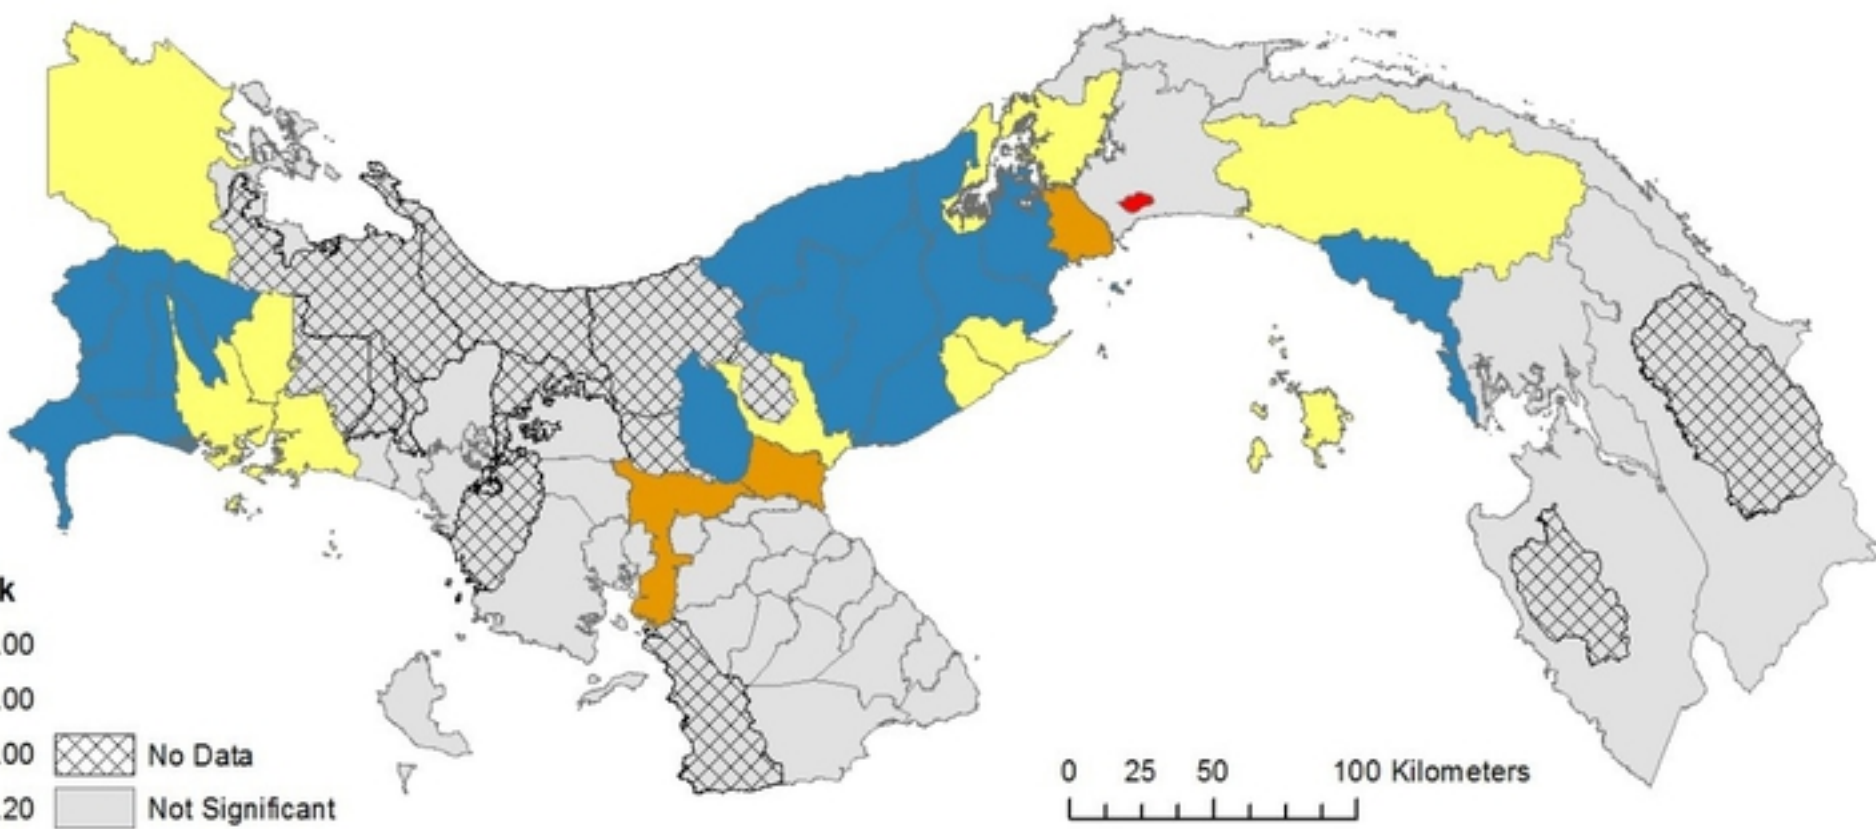

Figure 5
